# Supplementary material for: Different Patterns of HIV-1 Replication in MACROPHAGES is Led by Co-Receptor Usage
Source: Medicina (Kaunas). 2019 Jun 21;55(6):297. doi: 10.3390/medicina55060297 (PMC6630780; doi:10.3390/medicina55060297)
Supplement: Supplementary file 1 [file medicina-55-00297-s001.pdf]

**Table S1.** Different changes in genes in R5 virus versus X4 virus infected incubated MDM.

|                         | N° Gene | GENE                                                                                     | 81A           | NL4-3         |
|-------------------------|---------|------------------------------------------------------------------------------------------|---------------|---------------|
| Apoptosis related genes | 1       | Fas (TNFRSF6)-associated via death domain                                                | Not activated | Activated     |
|                         | 2       | Tumour necrosis factor (TNF superfamily, member 2)                                       | Not activated | Activated     |
|                         | 3       | Heat shock transcription factor 2 (Hsf2)                                                 | Not activated | Activated     |
|                         | 4       | Mitogen-activated protein kinase 10 (c-Jun N-terminal kinase 3)                          | Not activated | Activated     |
|                         | 5       | Matrix metalloproteinase 9 (gelatinase B, 92kD gelatinase, 92kD type IV collagenase)     | Not activated | Activated     |
|                         | 6       | Matrix metalloproteinase 13 (collagenase 3)                                              | Not activated | Activated     |
|                         | 7       | G1 to S phase transition 1 (GSPT1/eRF3)                                                  | Not activated | Activated     |
|                         | 8       | Signal transducer and activator of transcription 3 (acute-phase response factor) (STAT3) | Not activated | Activated     |
|                         | 9       | Fibroblast growth factor 7 (keratinocyte growth factor) KGF                              | Not activated | Activated     |
|                         | 10      | Caspase 7, apoptosis-related cysteine protease                                           | Not activated | Activated     |
|                         | 11      | Cytochrome C                                                                             | Not activated | Activated     |
|                         | 12      | Interleukine 16 (lymphocyte chemoattractant factor)                                      | Not activated | Activated     |
| Survival related genes  | 13      | Defender against cell death 1(DAD-1)                                                     | Activated     | Not activated |
|                         | 14      | Cullin 2 (hCUL2)                                                                         | Activated     | Not activated |
